# Supplementary material
Source: PubMed Central journal article supplement (PMC3466819)
Supplement: NIHMS368459-supplement-1_si_001.pdf [file NIHMS368459-supplement-1_si_001.pdf]

# **Design and Synthesis of Network-Forming Triblock Copolymers Using Tapered Block Interfaces**

Wei-Fan Kuan,<sup>†</sup> Raghunath Roy,<sup>†</sup> Lixia Rong,<sup>‡</sup> Benjamin S. Hsiao,<sup>‡</sup> and Thomas H. Epps, III<sup>\*†</sup>

<sup>†</sup>Department of Chemical and Biomolecular Engineering, University of Delaware, Newark, DE 19716, USA

<sup>‡</sup>Department of Chemistry, Stony Brook University, Stony Brook, NY 11974, USA

**~~-Supporting Information-~~**

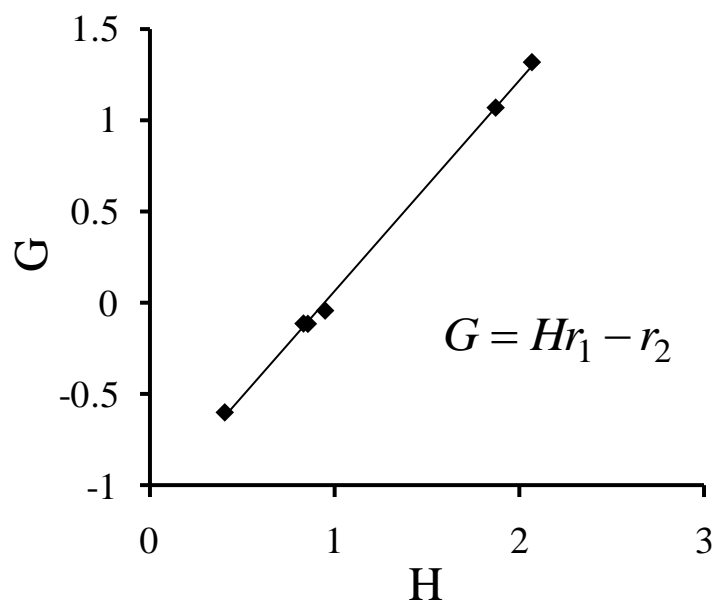

**Figure S1:** Fineman-Ross plot for the ATRP of polystyrene ( $M_1$ ) and poly(methyl methacrylate) ( $M_2$ ) copolymers (monomer ratio=1), where  $G = (f_1/f_2)(2F_1-1)/F_1$  and  $H = (f_1/f_2)^2(F_1/F_2)$ .  $f_1$  and  $f_2$  are the mole fractions of monomers ( $M_1$  and  $M_2$ ) in the feed;  $F_1$  and  $F_2$  are the mole fractions of  $M_1$  and  $M_2$  in the copolymers. The values of reactivity ratio can be obtained from the slope ( $r_1 = k_{11}/k_{12} = 1.16$ ) and the intercept ( $r_2 = k_{22}/k_{21} = 1.09$ ), where  $k_{11}$ ,  $k_{12}$ ,  $k_{22}$ , and  $k_{21}$  are reaction rate coefficients.<sup>28,31</sup>

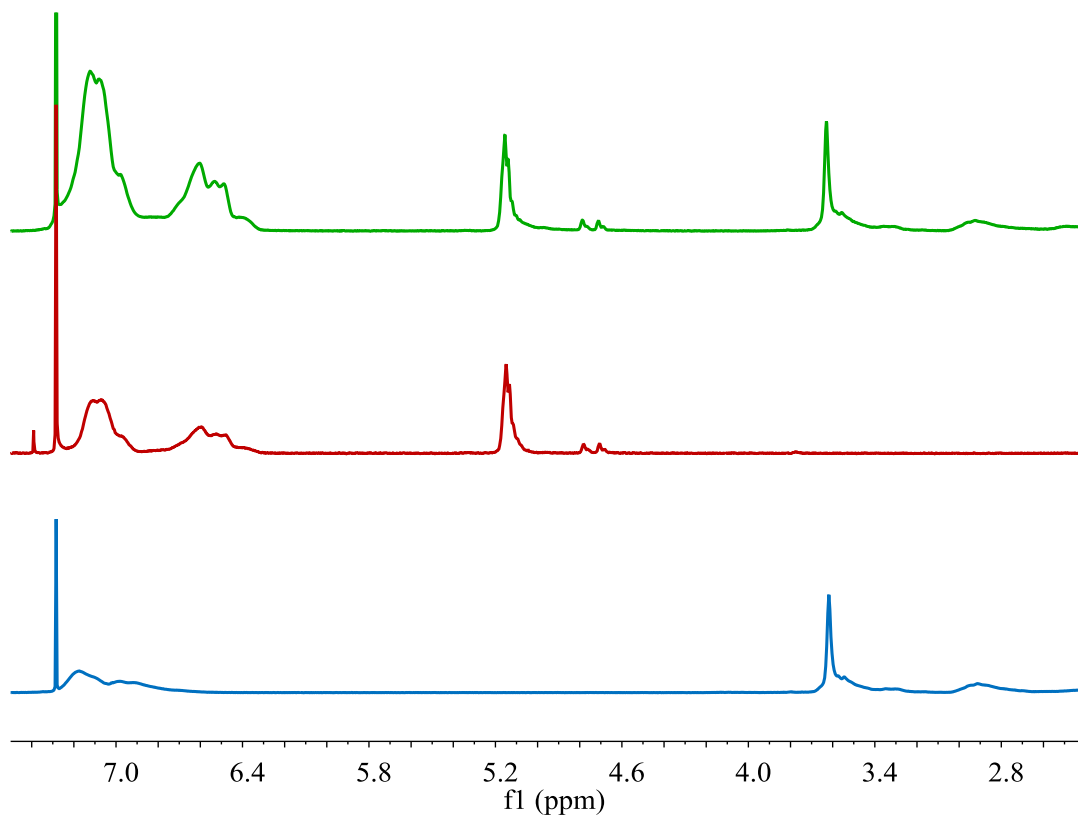

**Figure S2:** Representative <sup>1</sup>H-NMR of the P(SM-M) tapered copolymer (blue), P(I-IS-S) tapered diblock copolymer (red), and P(I-IS-S-SM-M) tapered triblock copolymer (green) in CDCl<sub>3</sub> (7.26 ppm). The composition of the polymers was calculated based on the polystyrene (6.2-7.2 ppm), polyisoprene (4.6-5.2 ppm), and poly(methyl methacrylate) (2.6-3.7 ppm) peak integrations. Spectra are shifted vertically for clarity.
